# Supplementary material
Source: publisher figshare collection journal article supplement (https://acs.figshare.com/ndownloader/files/4496980)
Supplement: Supplementary file 1 [file 4496980]

Supporting Information to

Estimation of Migration-time and Mobility Distributions in Organelle  
Capillary Electrophoresis with Statistical-Overlap Theory

by

Joe M. Davis\*

Department of Chemistry and Biochemistry  
Southern Illinois University at Carbondale  
Carbondale, IL 62901 USA

and

Edgar A. Arriaga  
Department of Chemistry  
University of Minnesota  
Minneapolis, MN 55455 USA

\*corresponding author

Current address: 733 Schloss Street

Wrightsville Beach, NC 28480

Phone: 910 256 4235

e-mail: [chimicajmd@ec.rr.com](mailto:chimicajmd@ec.rr.com)

This Supporting Information contains five parts. Each part identifies the relevant section of the main article. The terminology is the same as the main article.

### **Part 1. Conversion between $\alpha$ and $\alpha_e$**

The conversions between saturation  $\alpha$  and effective saturation  $\alpha_e$  are mentioned in the paragraph of the main article after eq 2b. They are appropriate for an exponential distribution of peak heights. Over the range,  $0 \leq \alpha_e \leq 25$ ,  $\alpha_e$  can be converted to  $\alpha$  using the empirical expression<sup>1</sup>

$$\alpha = \frac{0.725\alpha_e}{1 + \delta_1\alpha_e^{\delta_2}} \quad (\text{S-1})$$

with  $\delta_1 = 0.1942 \pm 0.0005$  and  $\delta_2 = 0.930 \pm 0.001$ . Over the range,  $0 \leq \alpha \leq 3.85$ ,  $\alpha$  is converted to  $\alpha_e$  on dividing  $\alpha$  by  $R_s^*$ , as expressed by eq 4c in the main article.

### **Part 2. Standard deviation $\sigma_{m_e}$ of $m_e$ distribution**

The standard deviation  $\sigma_{m_e}$  is first mentioned in the paragraph of the main article containing eq 4.

*Theory.* Consider a separation ensemble containing peaks of constant density and width, with peak numbers and migration times obeying Poisson statistics. Each member of the ensemble contains  $m$  peaks and  $p$  observed peaks. Consider equating  $p$  to

$$\bar{p} = \bar{m} \exp(-\alpha) \quad (\text{S-2})$$

where

$$\alpha = 4\bar{m}\sigma R_s^* / X \quad (\text{S-3})$$

and solving for  $\bar{m}$ . (Eqs S-2 and S-3 are eqs 1b and 1a, respectively, in the main article.) Here,  $\bar{m}$  and  $\bar{p}$  are the mean numbers of peaks and observed peaks in the ensemble,  $\alpha$  is the saturation,  $\sigma$  is the peak standard deviation,  $R_s^*$  is the average minimum resolution (which depends on  $\alpha$ ), and  $X$  is the duration of the separation. We assume  $\bar{m}$  is the

only unknown, with  $\sigma$ ,  $X$ , and  $R_s^*$  being known or calculable. The determined  $\bar{m}$  is interpreted as the estimated number of peaks,  $m_e$ .

We assume that  $m_e$  is distributed randomly about  $\bar{m}$ , just as  $p$  is distributed randomly about  $\bar{p}$ . The difference  $\Delta m = m_e - \bar{m}$  is related to the difference  $\Delta p = p - \bar{p}$  by the first-order Taylor series

$$\Delta m \approx \frac{\partial \bar{m}}{\partial \bar{p}} \Delta p = \frac{\partial \bar{m}}{\partial \alpha} \frac{\partial \alpha}{\partial \bar{p}} \Delta p \quad (\text{S-4})$$

where the final identity results from the chain rule (the derivatives are partials because  $\sigma/X$  is constant). The theory of the propagation of errors<sup>2</sup> is applied to  $J$  independent members of the ensemble by adding the squares of the left- and right-hand sides of eq S-4 and dividing by  $J$

$$J^{-1} \sum_{i=1}^J (m_{e_i} - \bar{m})^2 \approx J^{-1} \left[ \frac{\partial \bar{m}}{\partial \alpha} \frac{\partial \alpha}{\partial \bar{p}} \right]^2 \sum_{i=1}^J (p_i - \bar{p})^2 \quad (\text{S-5})$$

where  $p_i$  and  $m_{e_i}$  are the  $p$  and  $m_e$  values of the  $i^{\text{th}}$  ensemble member. The derivatives are factored out of the sum in eq S-5, because they are the same for every ensemble member. As  $J$  approaches infinity, eq S-5 has the limit

$$\sigma_{m_e}^2 = \left[ \frac{\partial \bar{m}}{\partial \alpha} \frac{\partial \alpha}{\partial \bar{p}} \right]^2 \sigma_p^2 \quad (\text{S-6})$$

where  $\sigma_{m_e}^2$  and  $\sigma_p^2$  are the variances of  $m_e$  and  $p$ , respectively. For peaks that are Poisson distributed,  $\sigma_p^2$  is

$$\sigma_p^2 = \bar{m} \exp(-\alpha) [1 - 2\alpha \exp(-\alpha)] \quad (\text{S-7})$$

(Eq S-7 is eq 3 in the main article.)

The derivatives in eq S-6 are evaluated simply. In accordance with eqs S-2 and S-3,  $\bar{m}$  and  $\bar{p}$  equal

$$\bar{m} = \alpha / (zR_s^*); \quad \bar{p} = \alpha \exp(-\alpha) / (zR_s^*) \quad (\text{S-8})$$

with  $z = 4\sigma / X$ . For constant peak widths (i.e., constant  $z$ )

$$\frac{\partial \bar{m}}{\partial \alpha} = \bar{m} \left[ \alpha^{-1} - d \ln R_s^* / d\alpha \right] \quad (\text{S-9})$$

and

$$\frac{\partial \bar{p}}{\partial \alpha} = \bar{m} \exp(-\alpha) \left( \alpha^{-1} - 1 - d \ln R_s^* / d\alpha \right) \quad (\text{S-10})$$

where  $d \ln R_s^* / d\alpha$  is  $[dR_s^* / d\alpha] / R_s^*$ .

We want the reciprocal of eq S-10,  $\partial \alpha / \partial \bar{p}$ , which in combination with eqs S-6 and S-9 gives

$$\sigma_{m_e}^2 = [g(\alpha)]^2 \sigma_p^2 \quad (\text{S-11a})$$

with

$$g(\alpha) = \frac{\alpha^{-1} - d \ln R_s^* / d\alpha}{\exp(-\alpha) [\alpha^{-1} - 1 - d \ln R_s^* / d\alpha]} \quad (\text{S-11b})$$

where  $g(\alpha)$  is the reciprocal of the slope,  $\partial \bar{p} / \partial \bar{m}$ , of the  $\bar{p}$  vs  $\bar{m}$  curve. When combined with eq S-7, the square root of eq S-11a gives  $\sigma_{m_e}$  as a function of  $\bar{m}$  and  $\alpha$

$$\sigma_{m_e} = (\bar{m} [1 - 2\alpha \exp(-\alpha)])^{1/2} \frac{\exp(\alpha/2) [\alpha^{-1} - d \ln R_s^* / d\alpha]}{\alpha^{-1} - 1 - d \ln R_s^* / d\alpha} \quad (\text{S-12})$$

The coefficient of variation ( $CV$ ),  $100 \sigma_{m_e} / \bar{m}$ , can be calculated from eq S-12. On substituting the left-hand side of eq S-8 for  $\bar{m}$  in eq S-12 and the  $CV$ , we obtain

$$\sigma_{m_e} (\sigma / X)^{1/2} = \frac{1}{2} \left( \frac{\alpha}{R_s^*} [1 - 2\alpha \exp(-\alpha)] \right)^{1/2} \frac{\exp(\alpha/2) [\alpha^{-1} - d \ln R_s^* / d\alpha]}{\alpha^{-1} - 1 - d \ln R_s^* / d\alpha} \quad (\text{S-13a})$$

$$\frac{CV}{(\sigma / X)^{1/2}} = 200 \left( \frac{R_s^*}{\alpha} [1 - 2\alpha \exp(-\alpha)] \right)^{1/2} \frac{\exp(\alpha/2) [\alpha^{-1} - d \ln R_s^* / d\alpha]}{\alpha^{-1} - 1 - d \ln R_s^* / d\alpha} \quad (\text{S-13b})$$

which are eqs 4a and 4b in the main article. Both  $R_s^*$  and  $d \ln R_s^* / d\alpha$  can be evaluated from eq 4c in that article.

The denominator of the final factor in eq S-13 is the negative of the bracketed term in eq 5 of the main article. The latter is proportional to the slope,  $\partial \bar{p} / \partial \bar{m}$ . Thus,  $\sigma_{m_e}$  and the CV approach infinity as  $\partial \bar{p} / \partial \bar{m}$  approaches zero.

In accordance with Poisson statistics, the standard deviation  $\sigma_m$  of the number of peaks in the ensemble is  $\sqrt{\bar{m}}$ . It differs from  $\sigma_{m_e}$ , which is the standard deviation of the *estimated* numbers of peaks  $m_e$ . The ratio  $\sigma_{m_e} / \sigma_m$  is calculated from eq S-12 as

$$\frac{\sigma_{m_e}}{\sigma_m} = (1 - 2\alpha \exp(-\alpha))^{1/2} \frac{\exp(\alpha/2)[\alpha^{-1} - d \ln R_s^* / d\alpha]}{\alpha^{-1} - 1 - d \ln R_s^* / d\alpha} \quad (\text{S-14})$$

and depends only on  $\alpha$ .

*Results and discussion.* Figure S-1a is a graph of the ratio  $\sigma_{m_e} / \sigma_m$  vs saturation  $\alpha$ , as calculated from eq S-14. As the saturation approaches zero, the ratio approaches one. This is expected, since at zero saturation all peaks are resolved and  $p = m = m_e$  for each ensemble member. As  $\alpha$  increases,  $\sigma_{m_e} / \sigma_m$  rapidly increases (e.g,  $\sigma_{m_e} = 3.40 \sigma_m$  at  $\alpha = 1$ ) and the precision of  $m_e$  decreases.

As discussed in the main article, the poor precision of  $m_e$  at high saturation results from the decreasing slope  $\partial \bar{p} / \partial \bar{m}$ , which maps small random fluctuations of  $p$  into large random fluctuations of  $m_e$ . Figure S-1b is a graph of  $g(\alpha)$  vs  $\alpha$ , where  $g(\alpha)$ , eq S-11b, is the reciprocal of this slope. It resembles Figure S-1a but increases with  $\alpha$  even more rapidly. Values of  $g(\alpha)$  agree with the reciprocal slope determined numerically from the graph of  $\bar{p}$  vs  $\bar{m}$ .

### Part 3. Monte-Carlo simulation of $m_e$ distribution

The Monte-Carlo simulations are mentioned in the main article after eq 4c.

*Procedures.* To characterize the  $m_e$  distribution,  $2 \times 10^5$  Monte-Carlo simulations of  $p$  and  $m$ , and calculations of  $m_e$ , were made. In each simulation, a Poisson distributed number  $m$  of Gaussian peaks having constant standard deviation  $\sigma$  and exponentially random heights spanned an interval of duration  $X$ , with peak overlap producing  $p$  observed peaks (maxima). This  $p$  then determined  $m_e$  via eqs S-2 and S-3 in Part 2 of the Supporting Information. Discrete distributions were built from the  $p$ ,  $m$ , and  $m_e$  values. Further details are given in the Procedures section of the main article.

*Results and Discussion.* The panels in Figure S-2 are graphs of probability vs  $p$ ,  $m$ , and  $m_e$  at different saturations  $\alpha$ , as determined for  $\sigma / X = 8 \times 10^{-5}$ . All distributions are discrete but are shown as continuous functions for simplicity. At low saturation (e.g.,  $\alpha = 0.2$ ), the  $m$  and  $m_e$  distributions are almost identical. As  $\alpha$  increases, the  $m_e$  distribution becomes broader than the  $m$  distribution, and its average shifts slightly downward from the mean of the  $m$  distribution,  $\bar{m}$ . The shift occurs, because eq S-2 slightly underestimates peak overlap as  $\alpha$  increases. Values of  $\sigma_{m_e}$  calculated from eq S-12 in Part 2 of the Supporting Information and from moments analysis of the  $m_e$  distributions are reported in the panels. At low  $\alpha$ , excellent agreement is found. At higher  $\alpha$ , eq S-12 overpredicts the standard deviation of  $m_e$ . In all cases,  $\sigma_{m_e}$  exceeds the standard deviation of the  $m$  distribution, which is  $\sqrt{\bar{m}}$  (and calculable from the  $\bar{m}$ 's reported in the panels). Further verification of eq S-12 is provided in the main article.

#### **Part 4. Equations for migration-time distributions $f(\zeta)$**

The equations are mentioned in the main article at the end of the first paragraph in the section, “Analysis of Migration-Time Distributions”, under Procedures. All migration-time distributions  $f(\zeta)$  are models, have unit area, and are bound by the reduced times,  $\zeta = 0$  and  $\zeta = 1$ . Normalization coefficients were obtained by integrating  $f(\zeta)$  between these bounds. Various coefficients were selected by trial and error to obtain the desired

appearance of  $f(\zeta)$ . Equations are given for the reduced migration times  $\zeta_c$  of peaks.

All random numbers  $R$  are uniform and bound by the integers, 0 and 1.

*Gaussian*  $f(\zeta)$ . The Gaussian migration-time distribution is

$$f(\zeta) = (2\pi\sigma_G^2)^{-1} \exp[-(\zeta - \mu)^2 / (2\sigma_G^2)] \quad (\text{S-15a})$$

with  $\mu = 0.5$  and  $\sigma_G = 0.125$ . A peak migration time  $\zeta_c$  was calculated with the Box-Muller transform<sup>3</sup>

$$\zeta_c = \mu + \sigma_G \left[ \sqrt{-2 \ln R_1} \sin(2\pi R_2) \right] \quad (\text{S-15b})$$

where  $R_1$  and  $R_2$  are independent random numbers (the radicand in eq S-15b is positive because  $\ln R_1$  is negative).

Strictly, eq S-15a is not normalized between  $\zeta = 0$  and  $\zeta = 1$ . However, the area between these bounds is  $\text{erf}(4/\sqrt{2}) \approx 0.9999^+$ , where erf is the error function. The very small fraction ( $< 0.01\%$ ) of peak migration times generated by eq S-15b outside the bounds was not used; its discard had negligible effect on results.

*Bimodal*  $f(\zeta)$ . The bimodal migration-time distribution is

$$f(\zeta) = A_1 \left\{ \zeta \exp(-\kappa_1 \zeta) + (1 - \zeta) \exp(-\kappa_2 [1 - \zeta]^2) \right\} \quad (\text{S-16a})$$

with  $\kappa_1$  and  $\kappa_2$  equaling constants (in the main article,  $\kappa_1 = 6.5$  and  $\kappa_2 = 8.5$ ). The normalization constant  $A_1$  is

$$A_1 = \left\{ [1 - \exp(-\kappa_2)] / (2\kappa_2) - \exp(-\kappa_1) / \kappa_1 + [1 - \exp(-\kappa_1)] / \kappa_1^2 \right\}^{-1} \quad (\text{S-16b})$$

A peak migration time  $\zeta_c$  was determined by solving

$$\begin{aligned} & (\kappa_1)^{-2} - \exp(-\kappa_2) / (2\kappa_2) - \exp(-\kappa_1 \zeta_c) (\zeta_c + \kappa_1^{-1}) / \kappa_1 \\ & + \exp(-\kappa_2 [1 - \zeta_c]^2) / (2\kappa_2) - R / A_1 = 0 \end{aligned} \quad (\text{S-16c})$$

using bisection, with  $R$  equaling a random number. Eq S-16c is based on a transformation of random numbers into an arbitrary distribution<sup>4</sup> (here, into eq S-16a).

*Asymmetric*  $f(\zeta)$ . The asymmetric migration-time distribution is

$$f(\zeta) = A_2 \zeta \exp(-\kappa_3 \zeta) \quad (\text{S-17a})$$

with  $\kappa_3$  equaling a constant (in the main article,  $\kappa_3 = 3.5$ ). The normalization constant  $A_2$  is

$$A_2 = \left\{ [1 - \exp(-\kappa_3)] / \kappa_3^2 - \exp(-\kappa_3) / \kappa_3 \right\}^{-1} \quad (\text{S-17b})$$

A peak migration time  $\zeta_c$  was determined by solving

$$[1 - \exp(-\kappa_3 \zeta_c)] / \kappa_3^2 - \zeta_c \exp(-\kappa_3 \zeta_c) / \kappa_3 - R / A_2 = 0 \quad (\text{S-17c})$$

using bisection, with  $R$  equaling a random number. Eq S-17c is based on the same transformation as eq S-16c.

*Constant  $f(\zeta)$ .* The constant migration-time distribution is

$$f(\zeta) = 1 \quad (\text{S-18a})$$

A peak migration time  $\zeta_c$  was determined as

$$\zeta_c = R \quad (\text{S-18b})$$

with  $R$  equaling a random number.

## **Part 5. Least square fits to graphs of $\alpha_t$ , $\alpha_{e,t}$ , and $\log(\bar{m}_t)$ vs $\log(\sigma / X)$**

The fits are mentioned in the main article at the end of the section, “Threshold Values of  $\bar{p}$  versus  $\bar{m}$  Curve”, in the Results and Discussion. Let  $s = \log(\sigma / X)$ . The graphs in Figure 3a of the main article can be estimated from the polynomial fits

$$\alpha_t = -0.9530 - 0.9848s - 0.1442s^2 - 0.007830s^3 \quad (\text{S-19})$$

$$\alpha_{e,t} = -1.423 - 1.287s - 0.0877s^2 \quad (\text{S-20})$$

$$\log(\bar{m}_t) = -1.986 - 1.949s - 0.1718s^2 - 0.01102s^3 \quad (\text{S-21})$$

with correlation coefficients of 0.99998 or larger.



## References

1. Davis, J.M.; Carr, P.W. *Anal. Chem.* **2009**, *81*, 1198-1207.
2. Bevington, P.R. *Data Reduction and Error Analysis for the Physical Sciences*; McGraw Hill Book Company: New York, 1969, pp. 56-60.
3. Dahlquist, G.; Bjorck, A. *Numerical Methods*; Prentice-Hall, Inc.: Englewood Cliffs, NJ, 1974, p. 453.
4. *Ibid.*, p. 452.

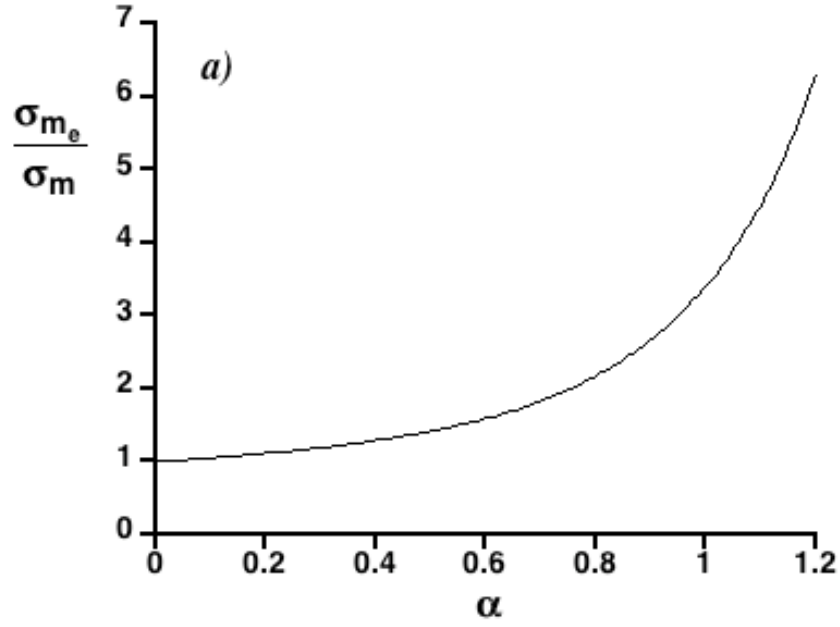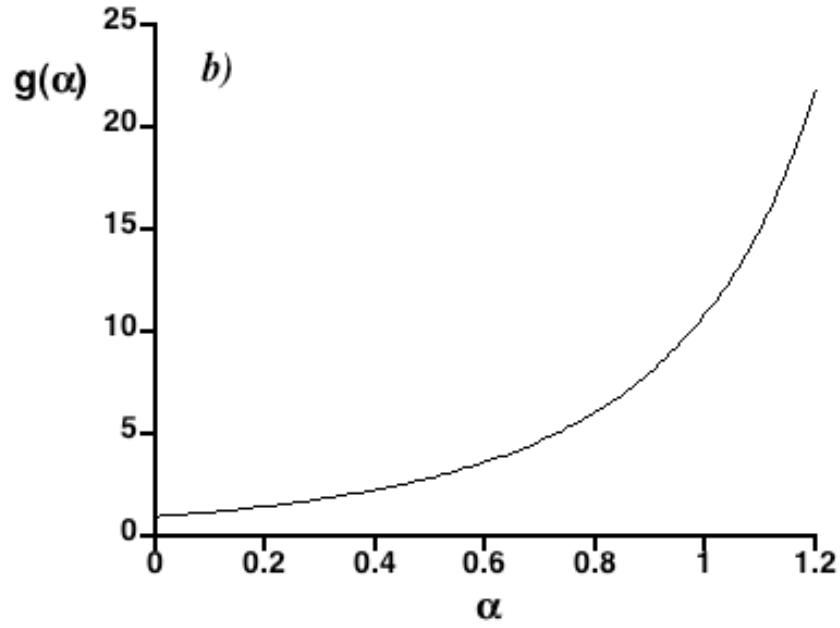

Figure S-1. a) Graph of  $\sigma_{m_e} / \sigma_m$  vs saturation  $\alpha$  (eq S-14). b) Graph of  $g(\alpha)$  vs  $\alpha$  (eq S-11b), with  $R_s^*$  equal to eq 4c of the main article.

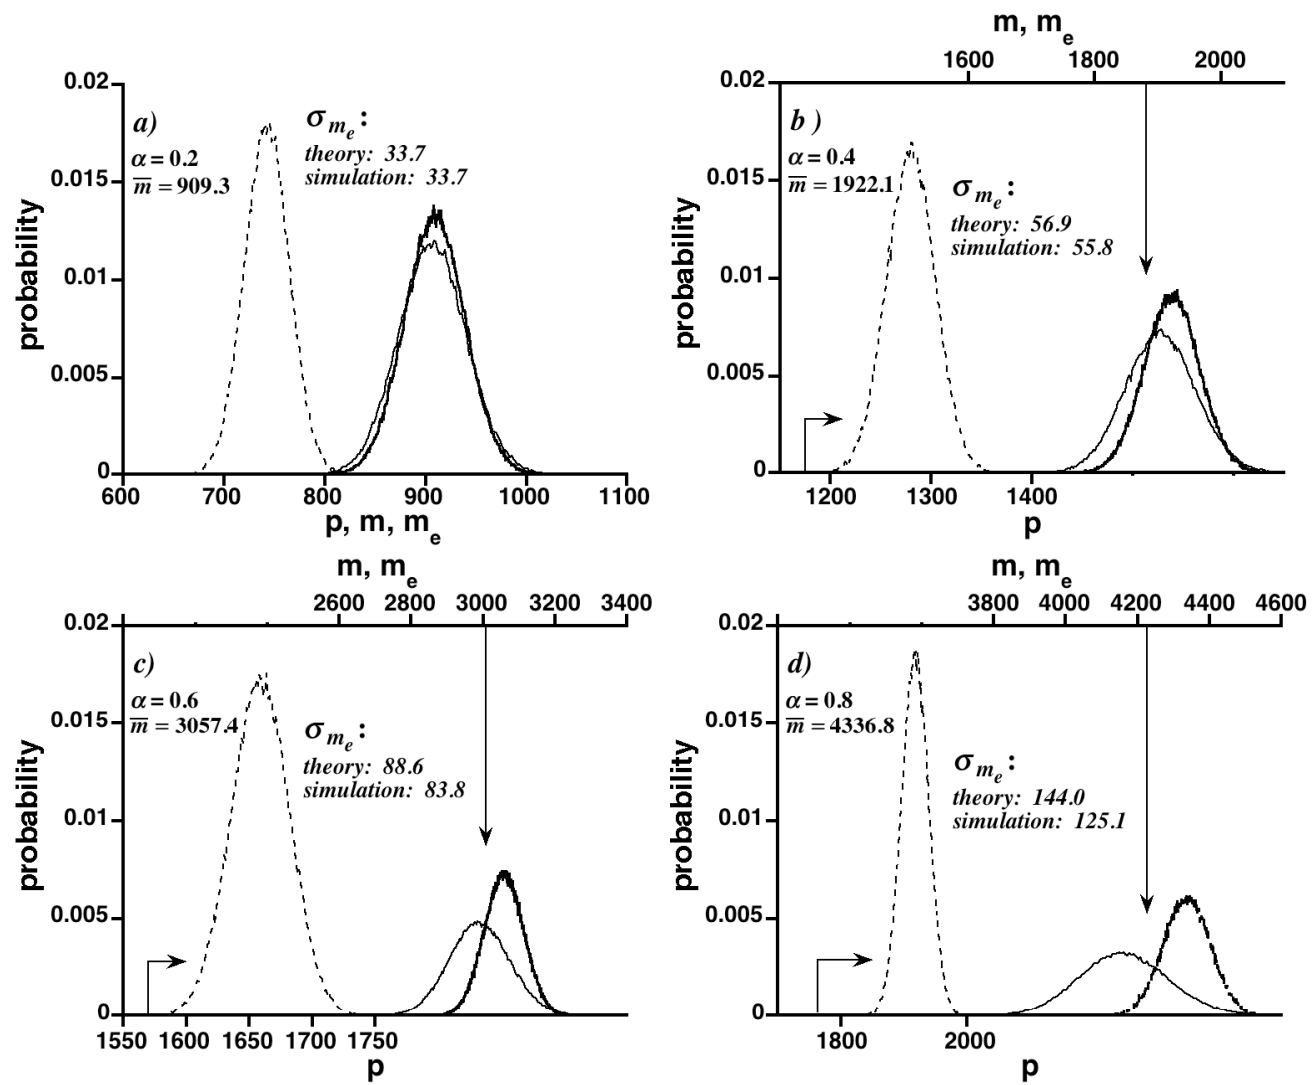

Caption on next page

Figure S-2. Graphs of discrete probability distributions vs  $p$ ,  $m$ , and  $m_e$ , as determined by Monte-Carlo simulations ( $p$ ,  $m$ ) and solutions to eqs S-2 and S-3 ( $m_e$ ) in Part 2 of the Supporting Information. Dashed, bold, and normal-weight curves are the  $p$ ,  $m$ , and  $m_e$  distributions, respectively. In b) – d) different abscissas are used for  $p$ , and for  $m$  and  $m_e$ , to reduce unused space.  $\sigma / X = 8 \times 10^{-5}$ . a)  $\alpha = 0.2$ . b)  $\alpha = 0.4$ . c)  $\alpha = 0.6$ . d)  $\alpha = 0.8$ .
